# Supplementary material
Source: PubMed Central journal article supplement (PMC7339282)
Supplement: ajcr0010-1691-f8.pdf [file ajcr0010-1691-f8.pdf]

Tyrosinase inhibitory activity with some quercetin fatty esters

**Table S1.** Clinical features of 50 patients with OSCC

| No. | Age | Sex | Location       | TNM     | Differentiation  |
|-----|-----|-----|----------------|---------|------------------|
| 1   | 81  | F   | Gingiva        | T3N0M0  | Well             |
| 2   | 53  | M   | Floor of mouth | T2N0M0  | Poor             |
| 3   | 66  | M   | Gingiva        | T2N2bM0 | Moderate         |
| 4   | 67  | F   | Floor of mouth | T2N0M0  | Moderate to poor |
| 5   | 62  | M   | Gingiva        | T2N0M0  | Moderate         |
| 6   | 61  | F   | Buccal         | T2N2bM0 | Moderate         |
| 7   | 62  | M   | Tongue         | T1N0M0  | Moderate to poor |
| 8   | 64  | M   | Floor of mouth | T1N2bM0 | Well             |
| 9   | 65  | F   | Gingiva        | T2N0M0  | Well             |
| 10  | 46  | M   | Tongue         | T2N2bM0 | Moderate to poor |
| 11  | 70  | M   | Gingiva        | T3N0M0  | Moderate         |
| 12  | 62  | M   | Buccal         | T3N2bM0 | Moderate to poor |
| 13  | 50  | F   | Tongue         | T3N2bM0 | Moderate         |
| 14  | 34  | M   | Tongue         | T1N2bM0 | Moderate to poor |
| 15  | 51  | F   | Buccal         | T2N1M0  | Poor             |
| 16  | 74  | M   | Buccal         | T2N0M0  | Moderate         |
| 17  | 59  | M   | Tongue         | T2N0M0  | Moderate to poor |
| 18  | 57  | M   | Palate         | T3N0M0  | Well             |
| 19  | 65  | M   | Gingiva        | T2N0M0  | Poor             |
| 20  | 52  | M   | Palate         | T2N1M0  | Moderate         |
| 21  | 65  | M   | Tongue         | T2N2bM0 | Moderate to poor |
| 22  | 67  | F   | Gingiva        | T2N2bM0 | Moderate         |
| 23  | 77  | M   | Gingiva        | T3N1M0  | Poor             |
| 24  | 54  | F   | Buccal         | T1N2bM0 | Moderate         |
| 25  | 66  | M   | Tongue         | T2N2cM0 | Moderate to poor |
| 26  | 62  | M   | Oropharynx     | TisN0M0 | Well             |
| 27  | 67  | F   | Buccal         | T1N0M0  | Well             |
| 28  | 74  | F   | Gingiva        | T3N2bM0 | Moderate to poor |
| 29  | 69  | M   | Gingiva        | T1N2bM0 | Moderate         |
| 30  | 63  | M   | Tongue         | T2N2bM0 | Moderate         |
| 31  | 43  | M   | Tongue         | T2N2aM0 | Poor             |
| 32  | 60  | F   | Gingiva        | T1N0M0  | Well             |
| 33  | 62  | F   | Buccal         | T3N0M0  | Moderate to poor |
| 34  | 77  | M   | Tongue         | T3N2bM0 | Well             |
| 35  | 56  | M   | Buccal         | T2N1M0  | Moderate         |
| 36  | 39  | F   | Tongue         | T3N2bM0 | Moderate         |
| 37  | 48  | M   | Buccal         | T1N1M0  | Moderate to poor |
| 38  | 51  | M   | Floor of mouth | T1N0M0  | Well             |
| 39  | 62  | F   | Oropharynx     | T2N0M0  | Moderate to poor |
| 40  | 70  | F   | Tongue         | T2N1M0  | Poor             |
| 41  | 52  | F   | Floor of mouth | T3N2bM0 | Poor             |
| 42  | 47  | M   | Gingiva        | T1N1M0  | Moderate         |
| 43  | 66  | M   | Palate         | T1N2aM0 | Poor             |
| 44  | 61  | M   | Tongue         | T3N1M0  | Moderate to poor |
| 45  | 56  | F   | Tongue         | T2N0M0  | Moderate         |
| 46  | 71  | M   | Tongue         | T2N1M0  | Moderate         |
| 47  | 42  | M   | Floor of mouth | T3N2cM0 | Moderate to poor |

## Tyrosinase inhibitory activity with some quercetin fatty esters

|    |    |   |        |         |          |
|----|----|---|--------|---------|----------|
| 48 | 33 | M | Tongue | T2N2bM0 | Moderate |
| 49 | 45 | F | Tongue | T3N2cM0 | Well     |
| 50 | 58 | F | Buccal | T1N0M0  | Moderate |

OSCC oral squamous cell carcinoma, F female, M male; TNM classification and tumor stage were determined by the Union for International Cancer Control (UICC).

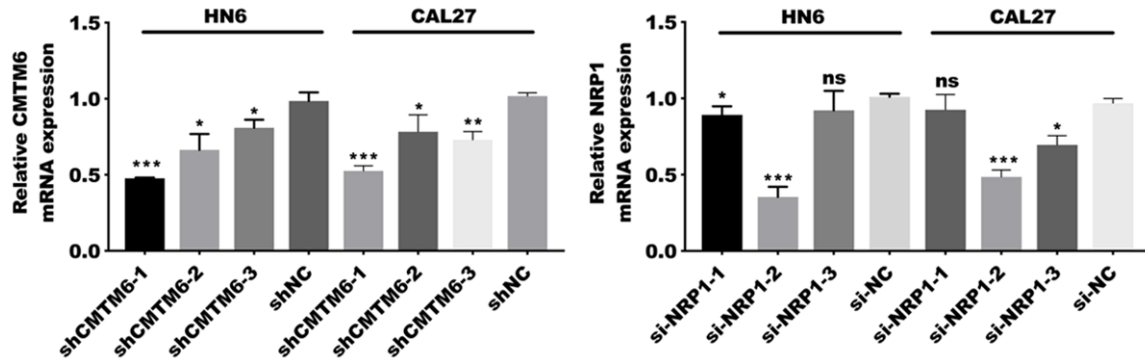

**Figure S1.** The interference efficiency was determined by qRT-PCR. The sequences of shCMTM6-1 and si-NRP1-2 and the corresponding control were introduced in this study.

# Tyrosinase inhibitory activity with some quercetin fatty esters

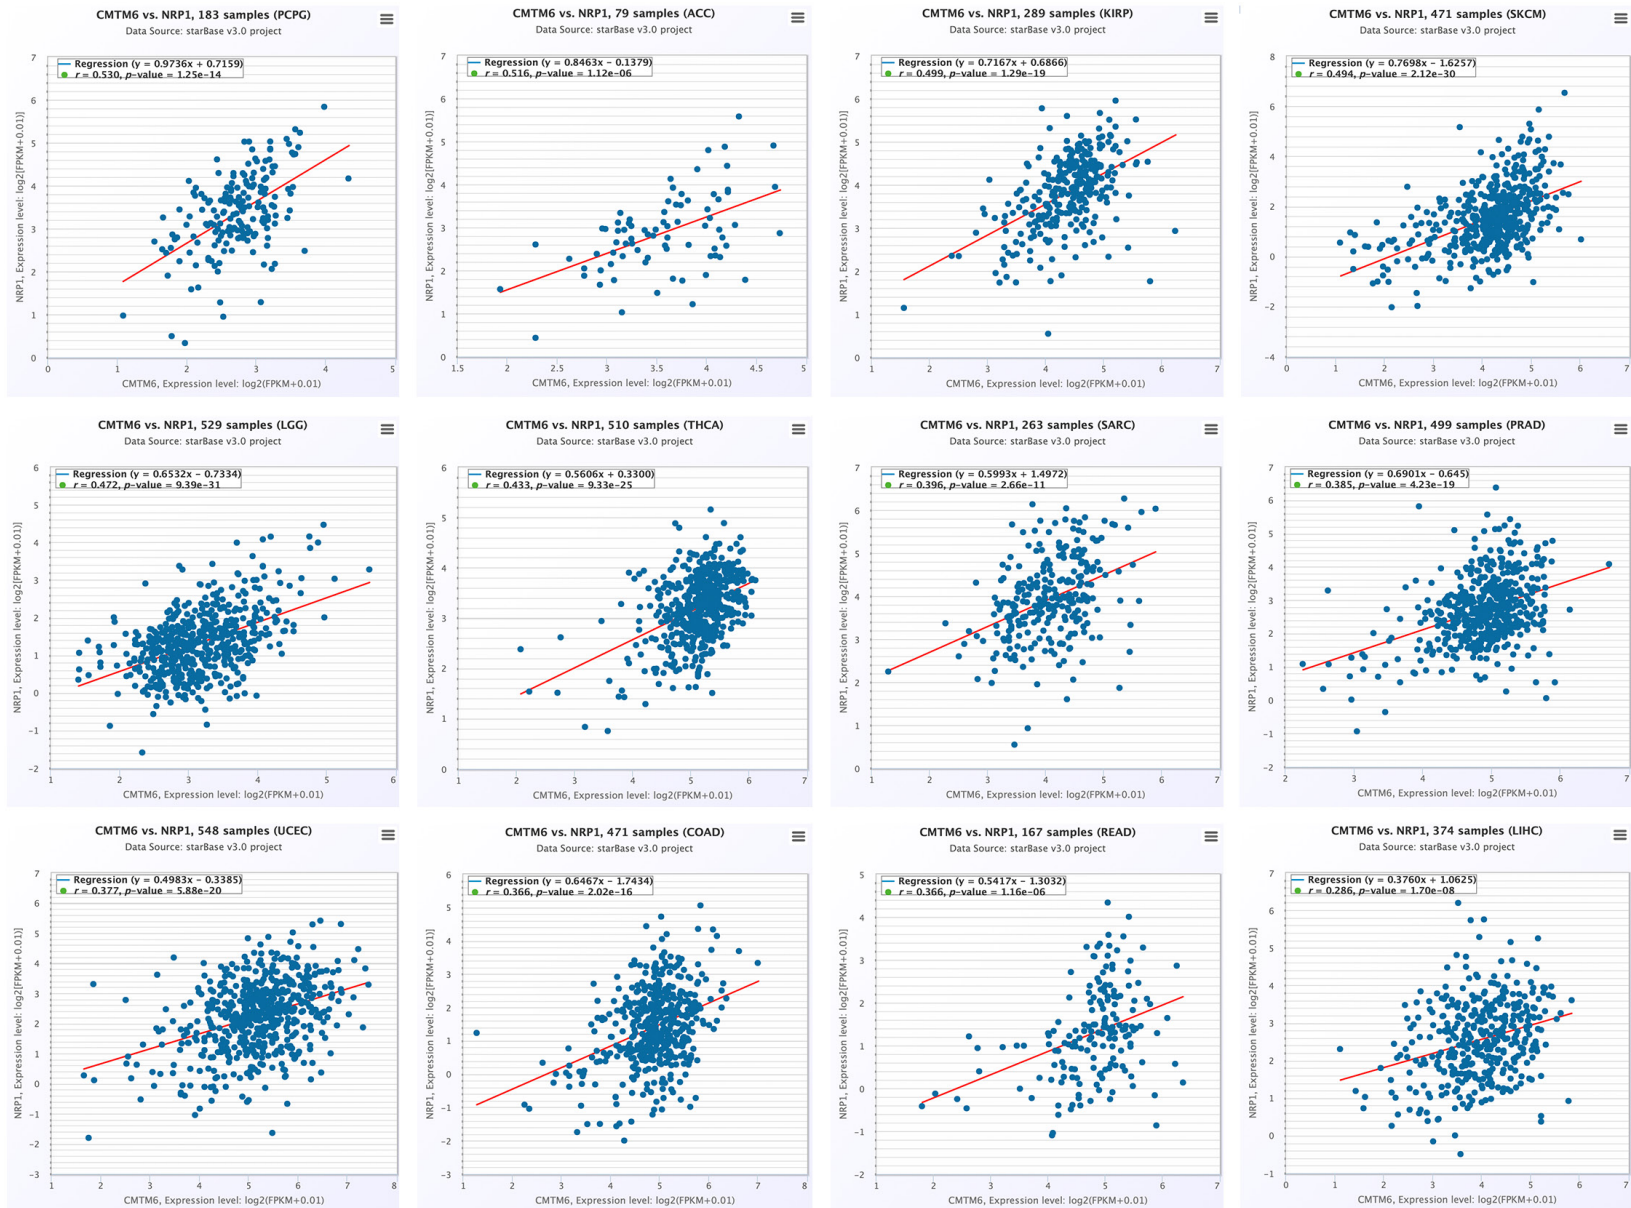

## Tyrosinase inhibitory activity with some quercetin fatty esters

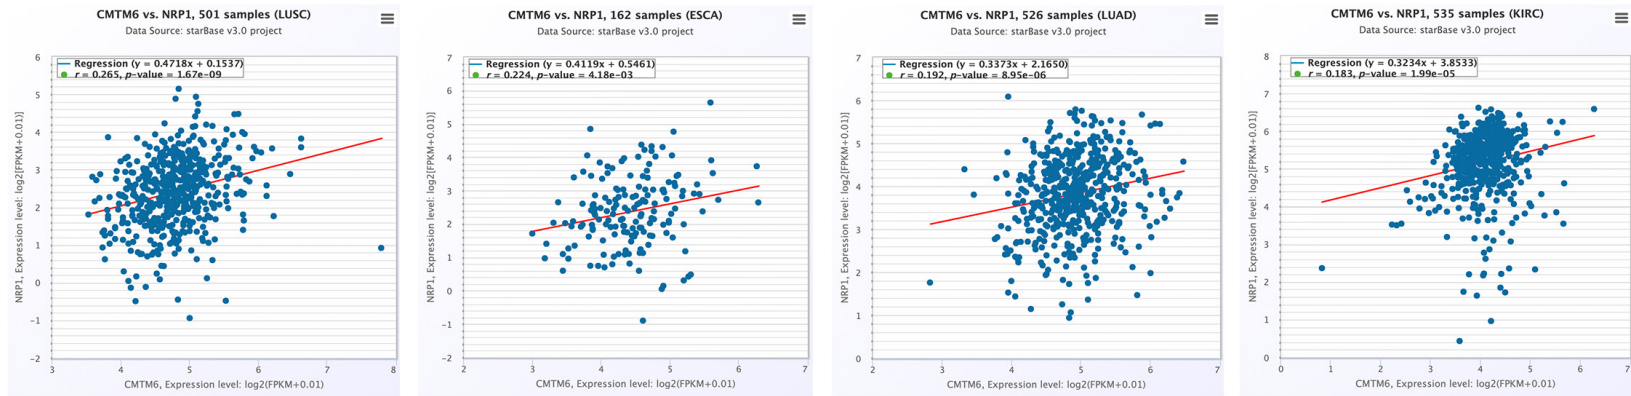

**Figure S2.** Analysis in The Cancer Genome Atlas (TCGA) of multiple cancer types showed that CMTM6 mRNA expression levels were positively related to NRP1 mRNA levels.

Tyrosinase inhibitory activity with some quercetin fatty esters

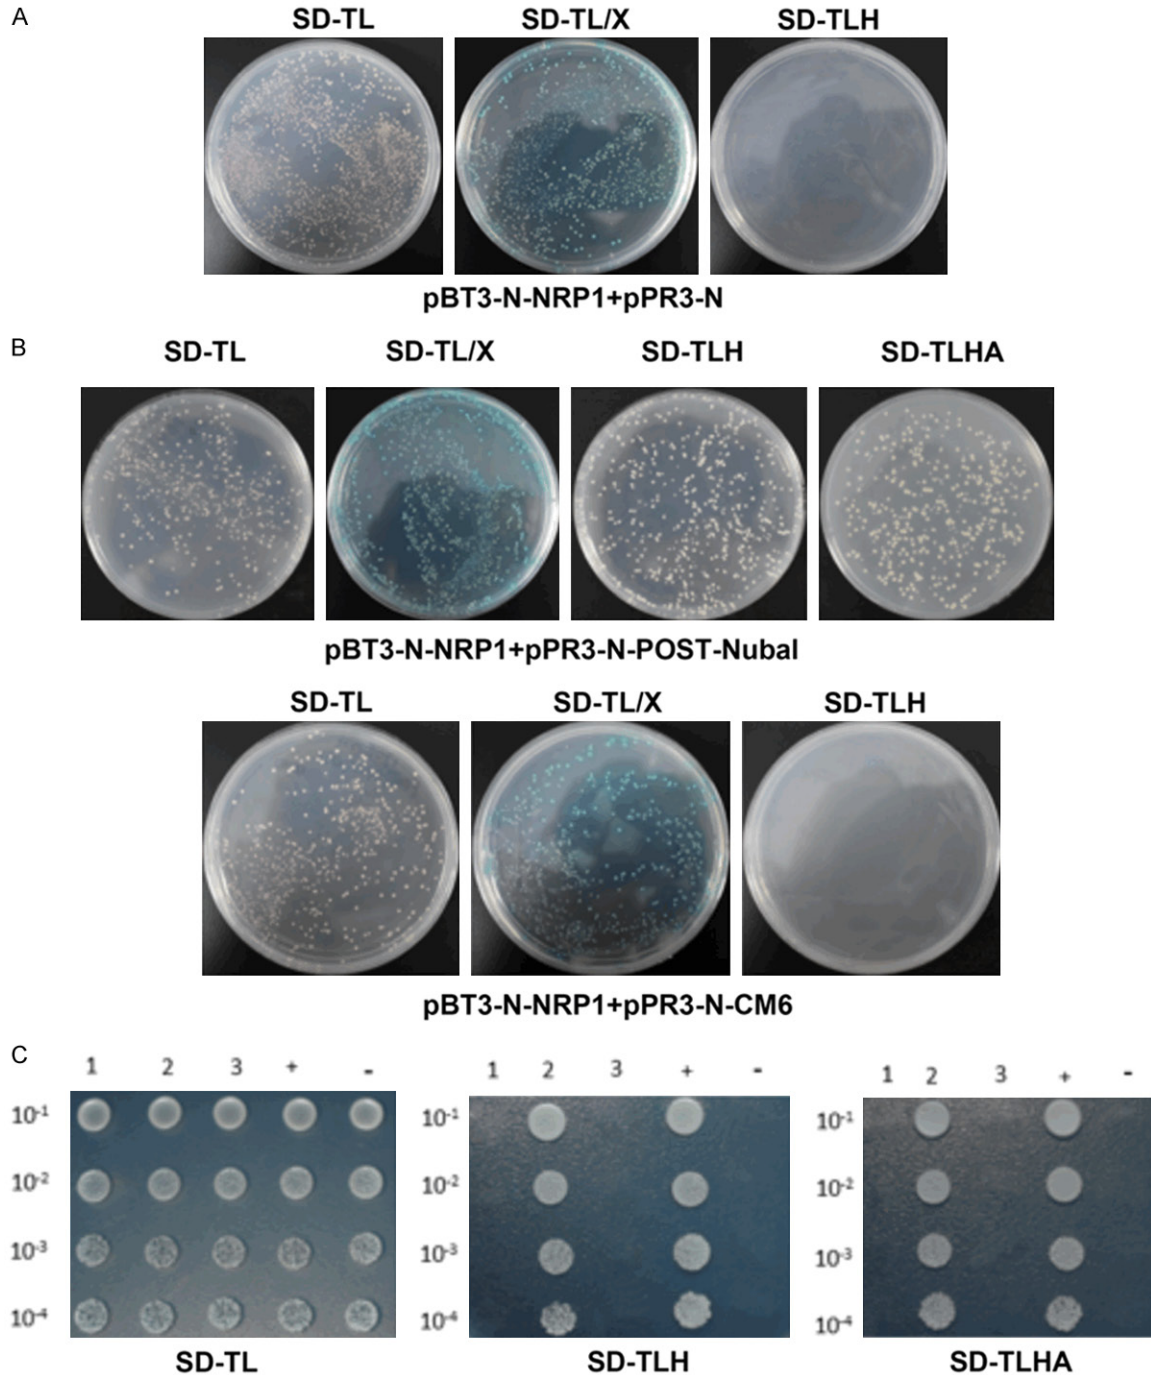

**Figure S3.** The Yeast two-hybrid assay was performed to verify the physical interaction between NRP1 and CMTM6. The DNA sequences encoding NRP1 and CMTM6 gene were cloned into the pBT3-N and pPR3-N vector, respectively. NRP1 worked as the Bait (pBT3-N-NRP1). CMTM6 was the Prey (pPR3-N-CM6). A. Bait plasmid toxicity detection and self-activation detection. The three plates from left to right were SD/-Leu/-Trp, SD/-Leu/-Trp/X, SD/-Leu/-Trp/-His. B. Both recombinant plasmids were co-transformed into the yeast strain NMY51. Protein interaction enables the yeast to make the His3 enzyme, thereby permitting histidine biosynthesis and growth on His minimal medium. Colony formation was not detected in the SD/-Leu/-Trp/-His plate, therefore, protein interaction was not existed. C. Point board verified the result. 1: co-transformation of pBT3-N-NRP1 and pPR3-N. 2: co-transformation of pBT3-N-CM6 and pPR3-N-POST-Nubal. 3: co-transformation of pBT3-N-NRP1 and pPR3-N-CM6. +: co-transformation of pTSU2-APP and pNubG-Fe65 (positive control). -: co-transformation of pBT3-SUC and pPR3-N (negative control).
